# Supplementary material for: Fabrication of nanohybrids assisted by protein-based materials for catalytic applications
Source: Royal Society of Chemistry journal article supplement (doi:10.1039/c9cy02466b), 2020-01-01
Supplement: c9cy02466b1.pdf [file c9cy02466b1.pdf]

## **Fabrication of nanohybrids assisted by protein-based materials for catalytic applications**

*Mingyue Liu,<sup>†a</sup> Tao Yu,<sup>†b</sup> Renliang Huang,<sup>c</sup> Rongxin Su,<sup>\*b,d,e</sup> Wei Qi<sup>b,d</sup> and Zhimin He<sup>b</sup>*

---

*<sup>a</sup> School of Pharmaceutical and Chemical Engineering, Taizhou University, 1139 Shifu Avenue, Taizhou 318000, China*

*<sup>b</sup> State Key Laboratory of Chemical Engineering, Tianjin Key Laboratory of Membrane Science and Desalination Technology, School of Chemical Engineering and Technology, Tianjin University, Tianjin 300072, P. R. China E-mail: surx@tju.edu.cn*

*<sup>c</sup> School of Environmental Science and Engineering, Tianjin University, Tianjin 300072, P. R. China*

*<sup>d</sup> Collaborative Innovation Center of Chemical Science and Engineering (Tianjin), Tianjin 300072, P. R. China*

*<sup>e</sup> School of Marine Science and Technology, Tianjin University, Tianjin 300072, P. R. China*

† These authors contributed equally to this work.

**Table S1** The preparation and application of metal nanostructures templated by different proteins

| Protein templates               | Metal nanostructure                 | Synthesis condition                                                | Function                              | Ref.       |
|---------------------------------|-------------------------------------|--------------------------------------------------------------------|---------------------------------------|------------|
| Apo-ferritin                    | Pd NPs                              | Soaking and chemical reduction (NaBH <sub>4</sub> )                | Hydrogenation of alkenes              | 32, 86     |
| Urease                          | Au NPs (8.9±1.6 nm)                 | Soaking and biomineralization                                      | Catalytic reduction of p-nitroaniline | 51         |
| Silk-fibroin                    | Pd NPs                              | Soaking and chemical reduction (MeOH)                              | Highly chemoselective hydrogenation   | 68         |
| Apo-ferritin                    | Au-Ag Alloy NPs (5.6-6.3 nm)        | Soaking and biomineralization                                      | Catalytic reduction of 4-NP           | 52         |
| Cross-Linked Lysozyme Crystals  | Au NPs (1.19-2.33 nm)               | Soaking and biomineralization                                      | Catalytic reduction of 4-NP           | 4          |
| Cross-Linked Lysozyme Crystals  | Au NPs, Ag NPs                      | Soaking and biomineralization                                      | Catalytic reduction of 4-NP           | 7, 38      |
| Procyanidin Grafted ESM         | Ag NPs (2.19 nm)                    | Soaking and chemical reduction (procyanidin)                       | Catalytic reduction of 4-NP           | 8          |
| Thiolated ESM                   | Au NPs (11.7±1.5 nm)                | Chemical reduction (trisodium citrate)                             | Catalytic reduction of 4-NP           | 13         |
| β-lactoglobulin fibrils         | Au NPs, Pd NPs                      | Soaking and chemical reduction (NaBH <sub>4</sub> )                | Catalytic reduction of 4-NP           | 23, 29, 46 |
| β-lactoglobulin fibrils         | Cu-Ag Alloy NPs, Cu-Ag-Au Alloy NPs | Soaking and chemical reduction (NaBH <sub>4</sub> )                | Catalytic reduction of 4-NP           | 24         |
| ESM                             | Au NPs, Ag NPs                      | Soaking and biomineralization                                      | Catalytic reduction of 4-NP           | 26,85      |
| Silk-fibroin                    | Au NPs (50-100 nm)                  | Soaking and chemical reduction (sulfonated polyaniline)            | Catalytic reduction of 4-NP           | 69         |
| Rhizopus oryzae mycelia         | Pd NPs, Pt NPs, Ag NPs              | Soaking and biomineralization                                      | Catalytic reduction of 4-NP           | 71         |
| Rhizopus oryzae protein extract | Au NPs (5-65 nm)                    | Soaking and biomineralization                                      | Catalytic reduction of 4-NP           | 83         |
| Apo-ferritin                    | Au NPs (2-17 nm)                    | Photochemical reduction (Na-citrate)                               | Catalytic reduction of 4-NP           | 84         |
| Tobacco Mosaic Virus (TMV)      | Ag NPs (2-9 nm)                     | Soaking and biomineralization                                      | Catalytic reduction of 4-NP           | 42         |
| TMV                             | Pd NPs (11.5 nm)                    | Soaking and chemical reduction (NaPH <sub>2</sub> O <sub>2</sub> ) | Dichromate reduction                  | 37, 41     |
| TMV                             | Pd NPs (1-2 nm)                     | Soaking and biomineralization                                      | Dichromate reduction                  | 3          |
| Procyanidin grafted ESM         | Pt/Pd NPs                           | Soaking and chemical reduction (NaBH <sub>4</sub> )                | Dichromate reduction                  | 27         |

|                                      |                                                 |                                                                    |                                                            |         |     |
|--------------------------------------|-------------------------------------------------|--------------------------------------------------------------------|------------------------------------------------------------|---------|-----|
| Shewanella loihica PV-4              | Pd NPs (4-10 nm)                                | Soaking and chemical reduction (Sodium formate)                    | Dichromate reduction                                       | 104     |     |
| Tannic Acid-Grafted ESM              | Ag NPs (1-4 nm)                                 | Soaking and biomineralization                                      | Catalytic degradation of Azo Dyes                          | 14      |     |
| Gum olibanum                         | Pd NPs (75.3±0.7 nm)                            | Soaking and biomineralization                                      | Catalytic degradation of dye                               | 49      |     |
| Apo-ferritin                         | Pd NPs                                          | Soaking and chemical reduction (NaBH <sub>4</sub> )                | Suzuki–Miyaura cross-coupling reaction                     | 32      |     |
| Pyrococcus furiosus ferritin         | Pd NPs (5±1 nm)                                 | Soaking and biomineralization                                      | Aerobic oxidations                                         | 33      |     |
| Natural silk                         | MnO <sub>2</sub> NPs                            | Soaking and biomineralization                                      | Aerobic oxidations                                         | 97      |     |
| Pd4 peptide                          | Pd NPs                                          | Biomineralization                                                  | Stille Coupling Reaction                                   | 36      |     |
| Candida antarctica B lipase          | Pd NPs                                          | Soaking and chemical reduction (MeOH)                              | Suzuki–Miyaura reaction                                    | 50      |     |
| TMV                                  | Pd NPs                                          | Soaking and chemical reduction (NaPH <sub>2</sub> O <sub>2</sub> ) | Suzuki coupling reaction                                   | 40      |     |
| Rhizopus oryzae mycelia              | Pd NPs, Pt NPs, Ag NPs                          | Soaking and biomineralization                                      | Suzuki Coupling Reactions                                  | 71      |     |
| Apo-ferritin                         | Pt NPs (1-2 nm)                                 | Soaking and chemical reduction (NaBH <sub>4</sub> )                | Catalase and peroxidase activities                         | 15, 112 | 88, |
| Apo-ferritin                         | CeO <sub>2</sub> NPs (4.5 nm)                   | Dissociation–reconstruction                                        | Artificial redox enzyme activity                           | 16      |     |
| Heat shock protein cage              | Pt NPs (2.2±0.7 nm)                             | Soaking and chemical reduction (dimethylamine borane complex)      | Artificial hydrogenase activity                            | 39      |     |
| ESM                                  | NiCo <sub>2</sub> O <sub>4</sub> NPs (20-30 nm) | Soaking and chemical reduction (Urea)                              | Supercapacitors, Oxygen evolution reaction (OER) catalysis | 25      |     |
| M13 phage                            | Au/Pt core/shell Nanowires (NWs)                | Soaking and chemical reduction (ascorbic acid)                     | Electrocatalytic activity                                  | 30      |     |
| Insulin Amyloid Fibrils              | Pt-Pd NPs                                       | Soaking and biomineralization                                      | High Electrocatalytic Activity                             | 67      |     |
| ESM                                  | Y <sub>2</sub> O <sub>3</sub> @Pd NPs           | Soaking and biomineralization                                      | Methanol oxidation reaction                                | 87      |     |
| Bacteriophage P22                    | TiO <sub>2</sub> NPs (~10 nm)                   | Soaking and biomineralization                                      | Photocatalytic activity (degradation of methylene blue)    | 31      |     |
| Cowpea chlorotic mottle virus (CCMV) | β-TiO <sub>2</sub> NPs                          | Soaking and biomineralization                                      | Photocatalytic activity (degradation of methylene blue)    | 58      |     |
| ESM                                  | NiO/CeO <sub>2</sub> NPs                        | Soaking and biomineralization                                      | Methane steam reforming                                    | 72      |     |
